# Supplementary material
Source: PubMed Central journal article supplement (PMC7963705)
Supplement: 16-00882.pdf [file 16-00882.pdf]

**On-line Table 1: Association of thrombus characteristics with outcome and interaction with treatment effect<sup>a</sup>**

| Outcome/Effect Parameter                          | mRS at 90 Days, Common OR (95% CI), Univariable Analysis | mRS at 90 Days, Adjusted Common OR (95% CI), Multivariable Analysis | No Intracranial Occlusion on Follow-Up CTA, OR (95% CI), Univariable Analysis | No Intracranial Occlusion on Follow-Up CTA, OR (95% CI), Multivariable Analysis | Infarct Volume Follow-Up NCCT (mL), B Coefficient (95% CI), Univariable Analysis | Infarct Volume Follow-Up NCCT (mL), B Coefficient (95% CI), Multivariable Analysis | Interaction Term mRS at 90 Days, Adjusted OR (95% CI) |
|---------------------------------------------------|----------------------------------------------------------|---------------------------------------------------------------------|-------------------------------------------------------------------------------|---------------------------------------------------------------------------------|----------------------------------------------------------------------------------|------------------------------------------------------------------------------------|-------------------------------------------------------|
| Presence of ICA-T-occlusion <sup>b</sup>          | 0.61 (0.34-1.09) P = .098<br>(n = 199)                   | 1.0 (0.46-2.17) P = .99<br>(n = 186)                                | 0.51 (0.24-1.10) P = .086<br>(n = 157)                                        | 0.67 (0.21-2.16) P = .50<br>(n = 148)                                           | 42.2 (11-73.4) P = .008<br>(n = 134) <sup>§</sup>                                | 22.2 (-18.4-62.9) P = .28<br>(n = 125)                                             | 0.27 (0.65-1.10) P = .07<br>(n = 186)                 |
| Distance to thrombus (per cm) <sup>b,c</sup>      | 1.34 (1.04-1.73) P = .022<br>(n = 199) <sup>§</sup>      | 1.19 (0.84-1.67) P = .33<br>(n = 186)                               | 1.73 (1.19-2.52) P = .004<br>(n = 157) <sup>§</sup>                           | 1.40 (0.86-2.28) P = .17<br>(n = 148)                                           | -16.4 (-29.8-2.9) P = .017<br>(n = 134) <sup>§</sup>                             | -3.5 (-18.8-11.8) P = .65<br>(n = 125)                                             | 1.16 (0.67-2.02) P = .59<br>(n = 186)                 |
| Distance to thrombus <16 mm <sup>c</sup>          | 0.59 (0.31-1.13) P = .12<br>(n = 199)                    | 1.04 (0.66-1.58) P = .92<br>(n = 186)                               | 0.34 (0.14-0.81) P = .015<br>(n = 148) <sup>§</sup>                           | 0.77 (0.25-2.37) P = .66<br>(n = 148)                                           | 30.6 (-2.7-63.6) P = .069<br>(n = 134) <sup>§</sup>                              | 3.5 (-31-38) P = .84<br>(n = 125)                                                  | 0.97 (0.14-4.0) P = .98<br>(n = 186)                  |
| Length (per cm) <sup>d,e</sup>                    | 0.78 (0.59-1.08) P = .14<br>(n = 186)                    | 0.65 (0.29-1.46) P = .29<br>(n = 186)                               | 0.81 (0.56-1.18) P = .23<br>(n = 148)                                         | 0.68 (0.37-1.25) P = .22<br>(n = 148)                                           | 14.8 (-0.5-29.7) P = .051<br>(n = 134)                                           | 10.4 (-29.7-50.5) P = .61<br>(n = 125)                                             | 1.01 (0.60-2.17) P = .69<br>(n = 186)                 |
| Length >8 mm <sup>d</sup>                         | 0.32 (0.16-0.66) P = .002<br>(n = 186) <sup>§</sup>      | 0.97 (0.93-1.00) P = .061<br>(n = 186)                              | 0.98 (0.42-2.28) P = .96<br>(n = 148)                                         | 0.97 (0.91-1.04) P = .35<br>(n = 148)                                           | 41.5 (5.5-77.5) P = .024<br>(n = 125) <sup>§</sup>                               | 1.54 (-0.6-3.7) P = .16<br>(n = 125)                                               | 0.02 (0.15-2.99) P = .60<br>(n = 186)                 |
| Volume (per 10 mm <sup>3</sup> ) <sup>e</sup>     | 0.97 (0.94-1.00) P = .061<br>(n = 186)                   | 1.04 (0.66-1.58) P = .92<br>(n = 186)                               | 0.95 (0.89-1.00) P = .035<br>(n = 148) <sup>§</sup>                           | 0.65 (0.44-0.95) P = .027<br>(n = 157) <sup>§</sup>                             | 2.8 (1.0-4.5) P = .002<br>(n = 134)                                              | 4.5 (-14.5-23.5) P = .64<br>(n = 125)                                              | 0.98 (0.91-1.06) P = .75<br>(n = 186)                 |
| Density thrombus NCCT (per 10 HU)                 | 0.76 (0.57-1.02) P = .064<br>(n = 199)                   | 0.92 (0.83-1.01) P = .077<br>(n = 186)                              | 0.65 (0.44-0.95) P = .027<br>(n = 157) <sup>§</sup>                           | 0.94 (0.84-1.04) P = .22<br>(n = 157)                                           | 20.3 (5.5-35.7) P = .008<br>(n = 134) <sup>§</sup>                               | 10.4 (-14.5-23.5) P = .64<br>(n = 125)                                             | 1.31 (0.65-2.6) P = .45<br>(n = 186)                  |
| Relative density thrombus NCCT (per 10%)          | 0.93 (0.86-1.01) P = .098<br>(n = 199)                   | 1.09 (0.96-1.24) P = .18<br>(n = 186)                               | 0.94 (0.84-1.04) P = .22<br>(n = 157)                                         | 1.11 (0.91-1.35) P = .29<br>(n = 157)                                           | 4.1 (-0.13-8.4) P = .057<br>(n = 134)                                            | 0.95 (0.78-1.14) P = .57<br>(n = 186)                                              | 0.95 (0.78-1.14) P = .57<br>(n = 186)                 |
| Density thrombus CTA (per 10 HU) <sup>f</sup>     | 1.14 (1.01-1.28) P = .034<br>(n = 199) <sup>§</sup>      | 1.21 (1.02-1.43) P = .029<br>(n = 186) <sup>§</sup>                 | 1.11 (0.96-1.28) P = .16<br>(n = 157)                                         | 1.17 (1.01-1.36) P = .034<br>(n = 157) <sup>§</sup>                             | -3.8 (-9.7-2.1) P = .21<br>(n = 134)                                             | 1.15 (0.89-1.51) P = .27<br>(n = 186)                                              | 1.15 (0.89-1.51) P = .27<br>(n = 186)                 |
| Relative density thrombus CTA (per 10%)           | 1.33 (1.14-1.54) P = <.001<br>(n = 199) <sup>§</sup>     | 1.14 (0.96-1.4) P = .14<br>(n = 186)                                | 1.11 (0.91-1.35) P = .29<br>(n = 157)                                         | 1.20 (0.98-1.48) P = .082<br>(n = 157)                                          | -3.0 (-11.6-5.6) P = .49<br>(n = 134)                                            | 0.99 (0.72-1.38) P = .98<br>(n = 186)                                              | 0.99 (0.72-1.38) P = .98<br>(n = 186)                 |
| CTA attenuation increase (per 10 HU) <sup>f</sup> | 1.18 (1.05-1.33) P = .004<br>(n = 199) <sup>§</sup>      | 1.09 (0.96-1.24) P = .18<br>(n = 186)                               | 1.17 (1.01-1.36) P = .034<br>(n = 157) <sup>§</sup>                           | 1.18 (0.98-1.41) P = .08<br>(n = 148)                                           | -6.6 (-12.3-0.89) P = .024<br>(n = 134) <sup>§</sup>                             | -3.7 (-9.6-2.1) P = .21<br>(n = 125)                                               | 1.1 (0.86-1.43) P = .43<br>(n = 186)                  |
| Void fraction per 10% <sup>f</sup>                | 1.29 (1.10-1.51) P = .002<br>(n = 199) <sup>§</sup>      | 1.09 (0.96-1.24) P = .18<br>(n = 186)                               | 1.20 (0.98-1.48) P = .082<br>(n = 157)                                        | 1.24 (0.95-1.61) P = .12<br>(n = 148)                                           | -9.9 (-18.4-15.4) P = .021<br>(n = 134) <sup>§</sup>                             | -6.3 (-15.3-2.76) P = .17<br>(n = 125)                                             | 1.00 (0.71-1.43) P = .97<br>(n = 186)                 |

<sup>a</sup> See On-line Table 2 for the correlation coefficients.

<sup>b</sup> Characteristics are correlated ( $r > 0.5$ ).

<sup>c</sup> Characteristics are correlated ( $r > 0.5$ ).

<sup>d</sup> Characteristics are correlated ( $r > 0.5$ ).

<sup>e</sup> Characteristics are correlated ( $r > 0.5$ ).

<sup>f</sup> Characteristics are correlated ( $r > 0.5$ ).

<sup>§</sup> Significant.

**On-line Table 2: Correlation among thrombus CT characteristics**

|                          | Length            | Length > 8 | Volume  | DT                 | DT < 16 | ICA-T | HU NCCT | rHU NCCT | HU CTA            | rHU CTA           | CTA Attenuation Increase | Void Fraction |
|--------------------------|-------------------|------------|---------|--------------------|---------|-------|---------|----------|-------------------|-------------------|--------------------------|---------------|
| Length                   | 1                 |            |         |                    |         |       |         |          |                   |                   |                          |               |
| Length > 8               | 0.55 <sup>a</sup> | 1          |         |                    |         |       |         |          |                   |                   |                          |               |
| Volume                   | 0.73 <sup>a</sup> | 0.34       | 1       |                    |         |       |         |          |                   |                   |                          |               |
| DT                       | -0.25             | -0.17      | -0.26   | 1                  |         |       |         |          |                   |                   |                          |               |
| DT < 16                  | 0.21              | 0.24       | 0.22    | -0.81 <sup>a</sup> | 1       |       |         |          |                   |                   |                          |               |
| ICA-T                    | 0.24              | -0.064     | 0.38    | 0.51 <sup>a</sup>  | 0.25    | 1     |         |          |                   |                   |                          |               |
| HU NCCT                  | 0.36              | 0.21       | 0.42    | -0.41              | 0.31    | 0.43  | 1       |          |                   |                   |                          |               |
| rHU NCCT                 | 0.014             | 0.071      | 0.093   | -0.034             | 0.025   | 0.079 | 0.40    | 1        |                   |                   |                          |               |
| HU CTA                   | -0.0084           | -0.17      | -0.0080 | 0.018              | -0.018  | 0.056 | 0.072   | -0.12    | 1                 |                   |                          |               |
| rHU CTA                  | -0.047            | -0.16      | 0.071   | 0.17               | -0.21   | 0.14  | -0.022  | 0.096    | 0.54 <sup>a</sup> | 1                 |                          |               |
| CTA attenuation increase | -0.13             | -0.23      | -0.15   | 0.17               | -0.13   | 0.23  | -0.33   | -0.26    | 0.91 <sup>a</sup> | 0.53 <sup>a</sup> | 1                        |               |
| Void fraction            | -0.13             | -0.20      | -0.081  | 0.23               | -0.24   | 0.24  | -0.31   | -0.18    | 0.78 <sup>a</sup> | 0.77 <sup>a</sup> | 0.87 <sup>a</sup>        | 1             |

**Note:**—rHU indicates relative Hounsfield unit.

<sup>a</sup>Correlation coefficient >0.5.
